# Supplementary material
Source: PubMed Central journal article supplement (PMC1820695)

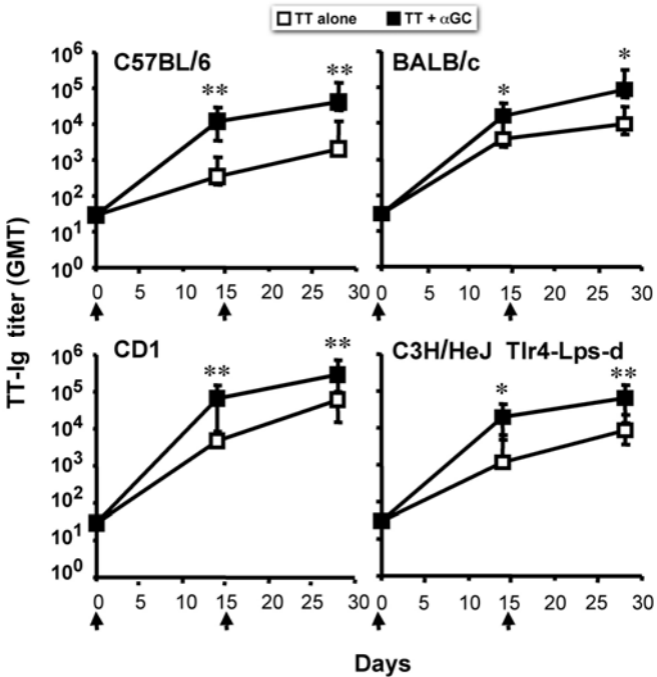

Supplement: pnas_0700191104_1.pdf [file pnas_0700191104_1.pdf]

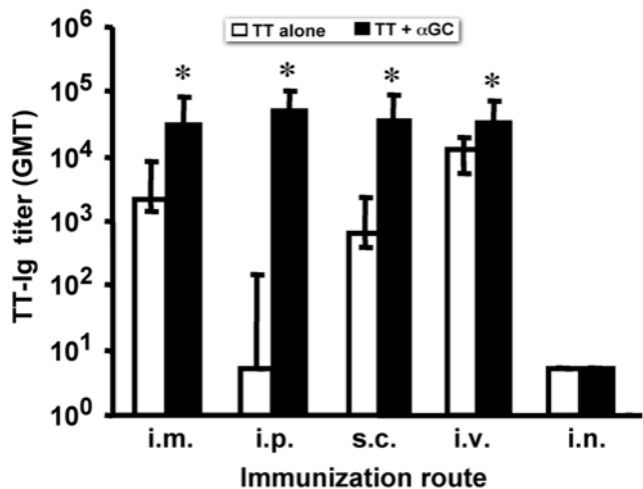

Supplement: pnas_0700191104_2.pdf [file pnas_0700191104_2.pdf]
